# Supplementary material for: JAK/STAT3 regulated global gene expression dynamics during late-stage reprogramming process
Source: PubMed Central journal article supplement (PMC5840728; doi:10.1186/s12864-018-4507-2), 2018-03-06

Supplementary Fig. S1

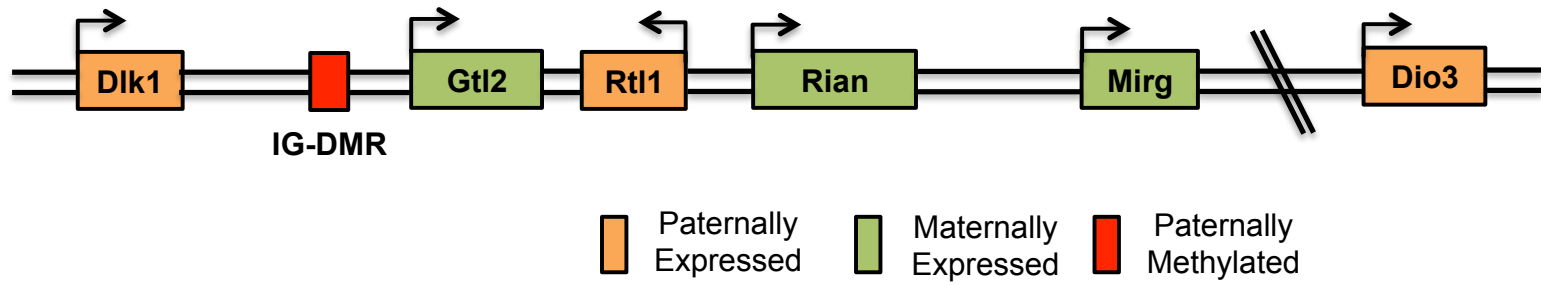

Supplement: 12864_2018_4507_MOESM1_ESM.pdf [file 12864_2018_4507_MOESM1_ESM.pdf]
